# Supplementary material for: Primary ciliogenesis requires the distal appendage component Cep123
Source: PubMed Central journal article supplement — Biol Open. 2013 Apr 9;2(6):535–45. doi: 10.1242/bio.20134457 (PMC3683156; doi:10.1242/bio.20134457), 2013-04-09
Supplement: supp_bio.20134457_bio.20134457-s1.pdf [file supp_bio.20134457_bio.20134457-s1.pdf]

## Supplementary Material

James E. Sillibourne et al. doi: 10.1242/bio.20134457

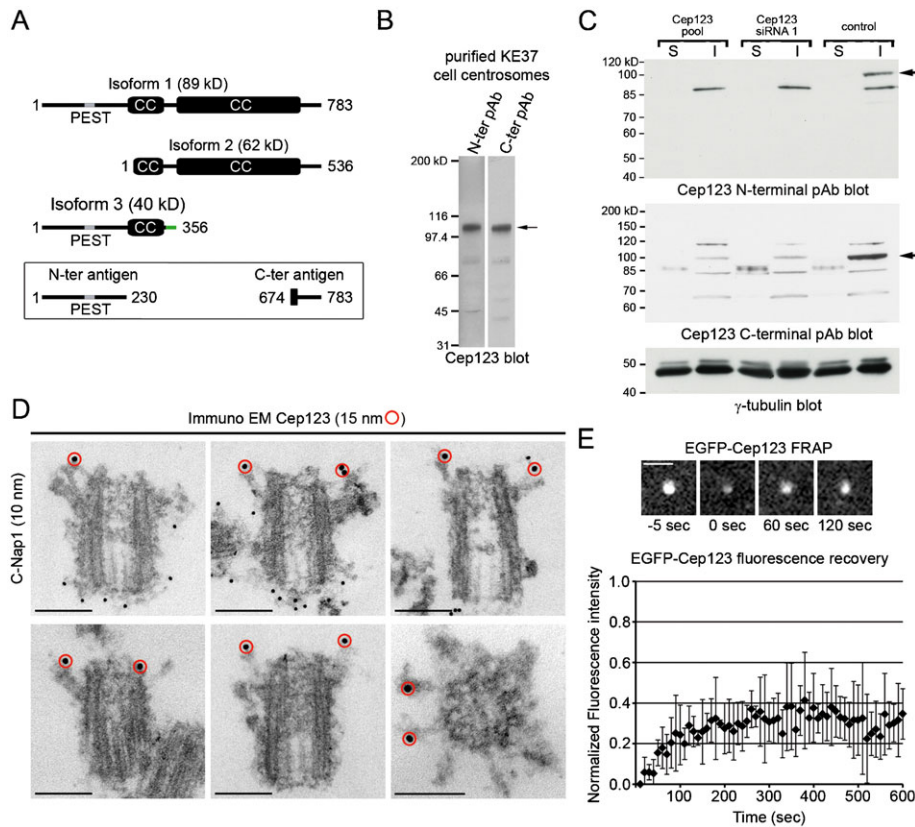

**Fig. S1. Characterization of Cep123.** (A) A diagram showing the location of the coiled-coil domains (CC) and potential PEST sequence (grey line) in the three putative isoforms of Cep123. Isoform 2 is identical to isoform 1 except that lacks residues 1–247, while isoform 3 is identical to isoform 1 with the exception of its last 13 amino acids, which are unique (green line). The two different antigens, N-ter and C-ter, used to raise antibodies against Cep123 are also shown. (B) Western blotting of fractionated centrosomes purified from KE37 cells with antibodies against the N- and C-terminus of Cep123 indicated that isoform 1 was the predominant centrosomal isoform, migrating with an apparent molecular weight of approximately 100 kD. (C) Western blotting of soluble and insoluble fractions from siRNA-treated RPE1 cells with anti-Cep123 N- and C-terminal antibodies demonstrated the specificity of the antibodies and showed that isoform 1 is the predominant cellular isoform of Cep123. (D) Electron micrographs of isolated centrosomes stained with the anti-Cep123 N-terminal antibody (15 nm gold particles marked with red circles) and anti-C-Nap1 antibody (10 nm gold particles). (E) FRAP analysis of RPE1 cells expressing EGFP-Cep123. Fluorescent images of centrosomal EGFP-Cep123 are shown before and after photobleaching and the results are presented as normalized fluorescent recovery ( $n=5$ ) with the standard deviation shown. The mean  $t_{1/2}$  recovery was calculated as  $61.8 \pm 40.6$  s. Scale bar: 1  $\mu$ m.

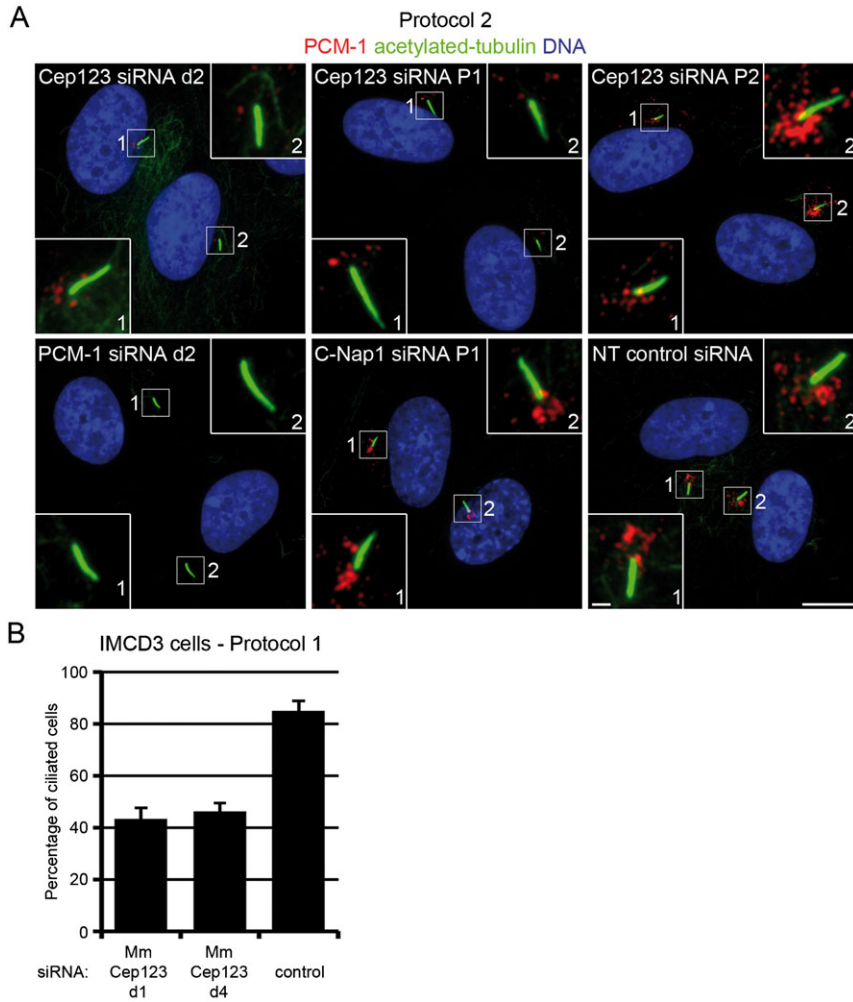

**Fig. S2. Cep123 is required for primary ciliogenesis.** (A) Immunofluorescent images of RPE1 cells treated with siRNA using protocol 2 (Fig. 4A) stained with DAPI to label the DNA (blue) and antibodies against acetylated tubulin (green) and PCM-1 (red). Scale bars: 10  $\mu$ m and inset 1  $\mu$ m. (B) Quantification of the effect of Cep123 depletion upon primary cilium formation in IMCD3 cells (Cep123 siRNA d1,  $P=2.68 \times 10^{-4}$  and Cep123 siRNA d4,  $P=2.24 \times 10^{-4}$ , student's t-test). The results represent the mean of three independent experiments ( $n=300$ ) and the s.d. is shown.

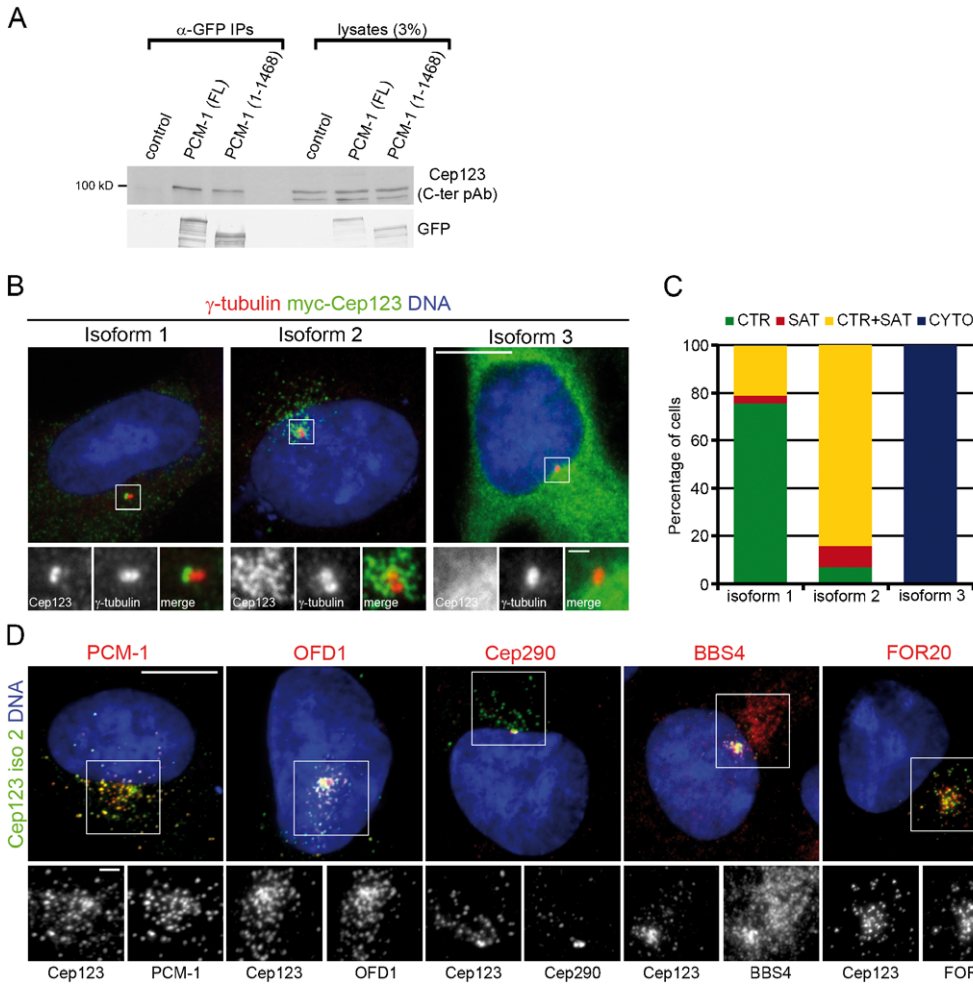

**Fig. S3. Centriolar satellite proteins interact with Cep123.** (A) Western blotting of anti-GFP immunoprecipitates from RPE1 cells transiently transfected with GFP-PCM-1 expression constructs with anti-GFP and anti-Cep123 C-terminal antibodies demonstrated that endogenous Cep123 co-precipitates with over-expressed PCM-1 and it interacts with a domain located between residues 1–1468 of PCM-1. (B) Immunofluorescent images of RPE1 cells transiently transfected with myc-tagged Cep123 constructs and stained with DAPI to label the DNA (blue) and antibodies against the myc-tag (green) and  $\gamma$ -tubulin (red). (C) Quantification of the number of transfected cells exhibiting Cep123 localized to the distal appendages and/or centriolar satellites. The results represent the mean of two independent experiments ( $n=100$ ). (D) Immunofluorescent images of RPE1 cells transiently transfected with myc-tagged isoform 2 of Cep123 constructs and stained with DAPI to label the DNA (blue) and antibodies against the myc-tag (green) and the centriolar satellite proteins PCM-1, OFD1, Cep290, BBS4 and FOR20 (all red). Cytoplasmic particles of Cep123 frequently co-localized with PCM-1 and OFD1, but not so often with BBS4, Cep290 and FOR20. Scale bars: 10  $\mu$ m and inset 1  $\mu$ m.

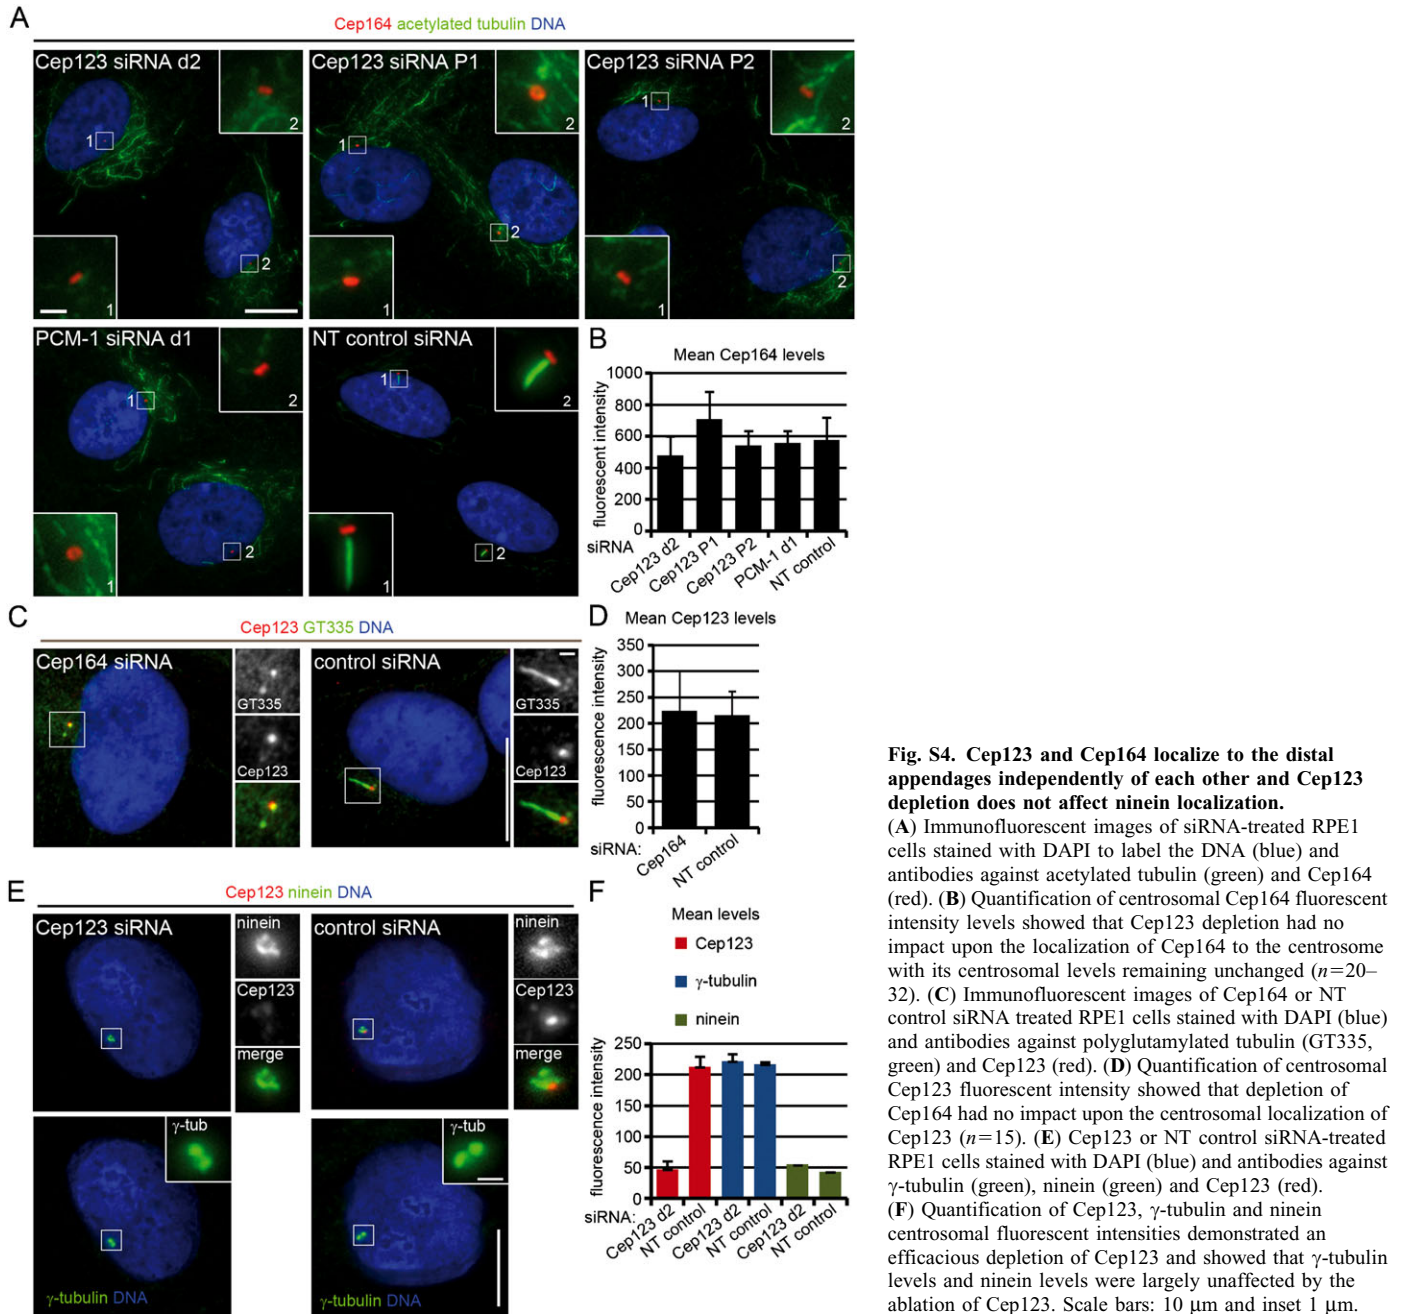

**Fig. S4. Cep123 and Cep164 localize to the distal appendages independently of each other and Cep123 depletion does not affect ninein localization.** (A) Immunofluorescent images of siRNA-treated RPE1 cells stained with DAPI to label the DNA (blue) and antibodies against acetylated tubulin (green) and Cep164 (red). (B) Quantification of centrosomal Cep164 fluorescent intensity levels showed that Cep123 depletion had no impact upon the localization of Cep164 to the centrosome with its centrosomal levels remaining unchanged ( $n=20-32$ ). (C) Immunofluorescent images of Cep164 or NT control siRNA treated RPE1 cells stained with DAPI (blue) and antibodies against polyglutamylated tubulin (GT335, green) and Cep123 (red). (D) Quantification of centrosomal Cep123 fluorescent intensity showed that depletion of Cep164 had no impact upon the centrosomal localization of Cep123 ( $n=15$ ). (E) Cep123 or NT control siRNA-treated RPE1 cells stained with DAPI (blue) and antibodies against  $\gamma$ -tubulin (green), ninein (green) and Cep123 (red). (F) Quantification of Cep123,  $\gamma$ -tubulin and ninein centrosomal fluorescent intensities demonstrated an efficacious depletion of Cep123 and showed that  $\gamma$ -tubulin levels and ninein levels were largely unaffected by the ablation of Cep123. Scale bars: 10  $\mu$ m and inset 1  $\mu$ m.

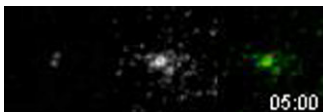

**Movie 1.** Live imaging of RPE1 cells transfected with mCherry-centrin-1 (left panel and red in merged images) and EGFP-Cep123 (center panel and green in merged images). Time is in minutes and seconds. Scale bar: 1  $\mu$ m.

Table S1. Cep123 cloning and GeneSOEing primers.

| Cep123 cloning | GeneSOEing primers                               |
|----------------|--------------------------------------------------|
| Cep123-S01     | 5'-GTCGACATGCTCCTGGGATTTTCGGAGAG-3'              |
| Cep123-AS01    | 5'-GGATCCCTAGCAGGTGGGGGCATGAGAC-3'               |
| Cep123 GS-Fw   | 5'-GCCAAATGCCAAGAAGACTCGCTCATCAGTACCTGGCAAACC-3' |
| Cep123 GS-Rv   | 5'-TGCCAGGTACTGATGAGCGAGTTCTTGGCATTGGCACG-3'     |

Table S2. SiRNA sequences.

|                                                                                 |                             |
|---------------------------------------------------------------------------------|-----------------------------|
| <b>C-Nap1 siRNA P1 (Human Cep250 Dharmacon ON-TARGET plus SMART pool siRNA)</b> |                             |
| J-012364-05                                                                     | 5'-GAGCAGAGCUACAGCGAAU-3'   |
| J-012364-06                                                                     | 5'-GGACCUCGCUGAACAAACUA-3'  |
| J-012364-07                                                                     | 5'-AAGCUGACGUGGUGAAUAA-3'   |
| J-012364-08                                                                     | 5'-GAGAAUAUGAUCCAAGAGA-3'   |
| <b>PCM-1 siRNA d1 and d2 (Qiagen)</b>                                           |                             |
| Hs PCM-1_1                                                                      | 5'-CAGUAUCACAUCUGAACUAAA-3' |
| Hs PCM-1_2                                                                      | 5'-CAGGCUUUAACUAAUUAUGGA-3' |
| <b>Cep123 siRNA d2 (Qiagen)</b>                                                 |                             |
| Hs Cep123_2                                                                     | 5'-CACCCUGGUUGUUGGAUUA-3'   |
| <b>Cep123 P1 (Human CCDC123 Dharmacon siGENOME pool siRNA)</b>                  |                             |
| D-021334-01                                                                     | 5'-CCGCAGGAGUCAUUUCAA-3'    |
| D-021334-02                                                                     | 5'-CUCAAGAACUGGUGGAUGA-3'   |
| D-021334-03                                                                     | 5'-UAGAGCAGUCUAAAGAUU-3'    |
| D-021334-17                                                                     | 5'-GGUGAACAGUGAAGACGAU-3'   |
| <b>Cep123 P2 (Human CCDC123 Dharmacon ON-TARGET plus SMART pool siRNA)</b>      |                             |
| J-021334-18                                                                     | 5'-CCGCAGGAGUCAUUUCAA-3'    |
| J-021334-19                                                                     | 5'-CACCAUUGUUGCUGGCUUA-3'   |
| J-021334-20                                                                     | 5'-AAAAGGAGCUGGCGGAGAA-3'   |
| J-021334-21                                                                     | 5'-GGUGAACAGUGAAGACGAU-3'   |
| <b>Mouse Cep123 siRNA d1 and d4 (Qiagen)</b>                                    |                             |
| Mm_2610507103Rik_1                                                              | 5'-CCAGAUGUAGCUGGUAGAAUA-3' |
| Mm_2610507103Rik_4                                                              | 5'-UACAUCAAAGAUUACAGAAA-3'  |
| <b>Cep164 [(Graser et al., 2007); Qiagen]</b>                                   |                             |
| Hs Cep164_278                                                                   | 5'-CAGGUGACAUUUACUUA-3'     |
| Hs Cep164_279                                                                   | 5'-ACCACUGGGAUAGAAGACAA-3'  |
| <b>Control [(Azimzadeh et al., 2009); Qiagen]</b>                               |                             |
| GL2 control                                                                     | 5'-CGUACGCGGAUACUUCGA-3'    |
